# Supplementary material for: Infection control measures to prevent outbreaks of COVID-19 in Quebec hemodialysis units: a cross-sectional survey
Source: PubMed Central journal article supplement — CMAJ Open. 2021 Dec 21;9(4):E1232–41. doi: 10.9778/cmajo.20210102 (PMC8695531; doi:10.9778/cmajo.20210102), 2021-12-21
Supplement: open-2021-0102-1-at.pdf [file open-2021-0102-1-at.pdf]

## Appendix 1: Data collection survey

### ***(Title translation : Overview of the infection prevention and control strategies aimed at preventing or limiting the transmission of COVID-19 in hemodialysis units within the province of Quebec)***

## **Portrait des Stratégies de prévention et Contrôle des infections visant à prévenir ou à limiter la transmission de la COVID-19 dans les unités d'hémodialyse à travers le Québec**

S'il vous plaît, remplir un questionnaire pour chaque unité associée à votre service (unité principale et satellites si possible) et le faire parvenir aux infirmiers/infirmières chef en question pour qu'ils puissent le remplir.

Vous pouvez enregistrer vos réponses et retourner de nouveau. Pour ce faire, vous aurez besoin le hyperlien du sondage <https://portal.rimuhc.ca/cim/redcap/surveys/?s=3FFCCR3XKY>

et le code fourni quand vous avez quitté le sondage (Return code).

Si vous avez des questions, et pour prévoir un rendez-vous téléphonique au besoin, n'hésitez pas à nous contacter ou communiquer avec les infirmières coordonnatrices de l'étude :

Marie-Line Caron :

Courriel : [marie-line.caron.chum@ssss.gouv.qc.ca](mailto:marie-line.caron.chum@ssss.gouv.qc.ca)

Norka Rios :

Courriel : [norka.rios@muhc.mcgill.ca](mailto:norka.rios@muhc.mcgill.ca)

## Information du site participant

Nom de l'unité

Nom du participant  
(à des fins de communiquer seulement)

courriel du participant ou  
numéro de téléphone  
(à des fins de communiquer seulement)

### 1. ORGANISATION PHYSIQUE DE L'UNITÉ D'HÉMODIALYSE (page 1 sur 4)

Nombre total de patients hémodialysés

Nombre de salles d'attente

Capacité moyenne de patients par salle pré-pandémie

Nombre de chaises d'hémodialyse

Nombre de chaises d'hémodialyse en isolement (total)

Nombre de chaises d'hémodialyse en isolement avec  
pression négative

## 1. ORGANISATION PHYSIQUE DE L'UNITÉ D'HÉMODIALYSE (page 2 sur 4)

Nombre de secteurs distincts (salle séparée)

---

Nombre moyen de postes de travail (ordinateurs) par secteur

---

Nombre moyen de distributeurs de gel alcoolisé par secteur

---

Nombre moyen de lavabos par secteur

---

## 1. ORGANISATION PHYSIQUE DE L'UNITÉ D'HÉMODIALYSE (page 3 sur 4)

---

Ratio moyen de patients : infirmier

-----

---

Ratio moyen de patients : infirmier auxiliaire

-----

---

Ratio moyen de patients : préposé

-----

## 1. ORGANISATION PHYSIQUE DE L'UNITÉ D'HÉMODIALYSE (page 4 sur 4)

Distance moyenne entre deux chaises dans la salle < 1 m 1-2 m > 2 m d'attente

Distance moyenne entre deux chaises d'hémodialyse  < 1 m  1-2 m  > 2 m

Distance moyenne entre les chaises d'hémodialyse et le poste de travail des infirmiers  < 1 m  1-2 m  > 2 m

De façon générale, considérez-vous que les zones d'attente sont surchargées?  Oui  Non

De façon générale, considérez-vous que les zones de traitement sont surchargées?  Oui  Non

## 2. PRÉCAUTIONS GÉNÉRALES EN LIEN AVEC LA COVID-19 (page 1 sur 7)

---

Oui  Non

patients ?

---

Avez-vous créé des zones distinctes pour les

Chaude / tiède / froide

-----

----

(Date AA-MM-JJ)

---

Chaude/ froide

-----

----

(Date AA-MM-JJ)

---

Tiède / froide

-----

\_\_\_\_ (Date AA-MM-JJ)

---

Avez-vous organisé des formations sur l'équipement de protection individuelle ?

Oui  Non

---

Date de mise en place (approximatif)

-----

----

(Date AA-MM-JJ)

## 2. PRÉCAUTIONS GÉNÉRALES EN LIEN AVEC LA COVID-19 (page 2 sur 7)

### Indiquez les stratégies physiques utilisées

(svp cochez toutes les réponses qui s'appliquent) :

Distanciation physique simple (ex. réorganisation  Oui  Non des chaises  
d'hémodialyse pour respecter une distance minimale de 2m)

Date de mise en place (approximatif)

\_\_\_\_\_  
(Date AA-MM-JJ)

Utilisation de barrières physiques (ex. rideau,  
paravent, Plexiglass, etc.)

Oui  Non

Date de mise en place (approximatif)

\_\_\_\_\_  
(Date AA-MM-JJ)

Cohorte de patients selon certains facteurs de risque  
(ex. CHSLD, retour de voyage, etc.)

Oui  Non

Date de mise en place (approximatif)

\_\_\_\_\_  
(Date AA-MM-JJ)

Autres stratégies physiques utilisées

\_\_\_\_\_  
\_\_\_\_\_

Date de mise en place (approximatif)

\_\_\_\_\_  
(Date AA-MM-JJ)



## 2. PRÉCAUTIONS GÉNÉRALES EN LIEN AVEC LA COVID-19 (page 3 sur 7)

Indiquez les mesures prises pour la surveillance et protection de l'infection à la COVID (svp cochez toutes les réponses qui s'appliquent) :

Interdiction des visiteurs  Oui  Non

Date de mise en place (approximatif)

\_\_\_\_\_  
(Date AA-MM-JJ)

Instructions aux patients d'appeler à l'unité de dialyse si symptômes compatibles avec la COVID  Oui  Non

Date de mise en place (approximatif)

\_\_\_\_\_  
(Date AA-MM-JJ)

Création d'un poste de triage afin d'identifier les patients symptomatiques avant leur entrée dans l'unité de dialyse  Oui  Non

Date de mise en place (approximatif)

\_\_\_\_\_  
(Date AA-MM-JJ)

Questionnaire téléphonique la veille de chaque traitement  Oui  Non

Date de mise en place (approximatif)

\_\_\_\_\_  
(Date AA-MM-JJ)

Questionnaire systématique à l'arrivée sur l'unité  Oui  Non

Date de mise en place (approximatif)

\_\_\_\_\_

(Date AA-MM-JJ)

## 2. PRÉCAUTIONS GÉNÉRALES EN LIEN AVEC LA COVID-19 (page 4 sur 7)

**Indiquez les mesures prises pour la surveillance et protection de l'infection à la COVID (svp cochez toutes les réponses qui s'appliquent) :**

Hygiène des mains obligatoire à l'arrivée sur l'unité et à la sortie  Oui  Non

Date de mise en place (approximatif)

\_\_\_\_\_  
(Date AA-MM-JJ)

Affiches visibles sur l'hygiène des mains et l'étiquette respiratoire  Oui  Non

Date de mise en place (approximatif)

\_\_\_\_\_  
(Date AA-MM-JJ)

Prise de température chez tous les patients à l'arrivée  Oui  Non

Date de mise en place (approximatif)

\_\_\_\_\_  
(Date AA-MM-JJ)

Seuil de température utilisé

\_\_\_\_\_

## 2. PRÉCAUTIONS GÉNÉRALES EN LIEN AVEC LA COVID-19 (page 5 sur 7)

**Indiquez les mesures prises pour la surveillance et protection de l'infection à la COVID (svp cochez toutes les réponses qui s'appliquent) :**

Prélèvement systématique chez tous les patients symptomatiques  Oui  Non

Date de mise en place (approximatif)

\_\_\_\_\_  
(Date AA-MM-JJ)

Prélèvement systématique chez tous les patients avec facteurs de risques (CHSLD, hospitalisations, contact positif, etc.)  Oui  Non

Date de mise en place (approximatif)

\_\_\_\_\_  
(Date AA-MM-JJ)

Prélèvement systématique chez tous les patients  Oui  Non

Date de mise en place (approximatif)

\_\_\_\_\_  
(Date AA-MM-JJ)

Prélèvement systématique chez tout le personnel médical  Oui  Non

Date de mise en place (approximatif)

\_\_\_\_\_  
(Date AA-MM-JJ)

## 2. PRÉCAUTIONS GÉNÉRALES EN LIEN AVEC LA COVID-19 (page 6 sur 7)

**Indiquez les mesures prises pour la surveillance et protection de l'infection à la COVID (svp cochez toutes les réponses qui s'appliquent) :**

Précautions gouttelettes/contact avec protection  Oui  Non oculaire pour tous les patients avec facteurs de risques (CHSLD, hospitalisations, contact positif, etc.)

Date de mise en place (approximatif)

\_\_\_\_\_  
(Date AA-MM-JJ)

Port du masque en continu pour tous les patients

Oui  Non

Date de mise en place (approximatif)

\_\_\_\_\_  
(Date AA-MM-JJ)

Port du masque pour toute l'équipe médicale

- En continu
- Lorsque < 2m de distance
- Seulement lors des soins

Port de la protection oculaire pour toute l'équipe médicale

- En continu
- Lorsque < 2m de distance
- Seulement lors des soins

## 2. PRÉCAUTIONS GÉNÉRALES EN LIEN AVEC LA COVID-19 (page 7 sur 7)

**Indiquez les mesures prises pour la surveillance et protection de l'infection à la COVID (svp cochez toutes les réponses qui s'appliquent) :**

Diminution de la fréquence des dialyses  
(2x/semaines) chez des patients sélectionnés  Oui  Non

Date de mise en place (approximatif)

\_\_\_\_\_  
(Date AA-MM-JJ)

Désinfection de routine des surfaces au sein de  
l'unité de dialyse  Oui  Non

Date de mise en place (approximatif)

\_\_\_\_\_  
(Date AA-MM-JJ)

Autres mesures prises pour la surveillance et  
protection de l'infection. SVP précisez

\_\_\_\_\_  
\_\_\_\_\_

Date de mise en place (approximatif)

\_\_\_\_\_  
(Date AA-MM-JJ)

### 3. PRÉCAUTIONS SPÉCIFIQUES CHEZ LES PATIENTS AVEC COVID-19 SUSPECTÉ (page 1 sur 4)

#### Indiquez les stratégies utilisées

(svp cochez toutes les réponses qui s'appliquent)

Précautions gouttelettes/contact avec protection oculaire  Oui  Non

Date de mise en place (approximatif)

\_\_\_\_\_  
(Date AA-MM-JJ)

Port du masque en continu pour tous les patients avec COVID suspectés  Oui  Non

Date de mise en place (approximatif)

\_\_\_\_\_  
(Date AA-MM-JJ)

Distanciation physique simple dans les zones d'attente  Oui  Non

Date de mise en place (approximatif)

\_\_\_\_\_  
(Date AA-MM-JJ)

Distanciation physique simple dans les zones de traitement  Oui  Non

Date de mise en place (approximatif)

\_\_\_\_\_  
(Date AA-MM-JJ)

Utilisation de barrières physiques (ex. rideau, paravent, Plexiglass, etc.)  Oui  Non

Date de mise en place (approximatif)

\_\_\_\_\_

(Date AA-MM-JJ)

### 3. PRÉCAUTIONS SPÉCIFIQUES CHEZ LES PATIENTS AVEC COVID-19 SUSPECTÉ (page 2 sur 4)

#### Indiquez les stratégies utilisées

(svp cochez toutes les réponses qui s'appliquent)

Salles individuelles à pression négative  Oui  Non

Date de mise en place (approximatif)

\_\_\_\_\_  
(Date AA-MM-JJ)

Salles individuelles, mais sans pression négative  Oui  Non

Date de mise en place (approximatif)

\_\_\_\_\_  
(Date AA-MM-JJ)

Secteurs d'hémodialyse séparés  Oui  Non

Date de mise en place (approximatif)

\_\_\_\_\_  
(Date AA-MM-JJ)

### 3. PRÉCAUTIONS SPÉCIFIQUES CHEZ LES PATIENTS AVEC COVID-19 SUSPECTÉ (page 3 sur 4)

#### Indiquez les stratégies utilisées

(svp cochez toutes les réponses qui s'appliquent)

Transfert à la zone tiède de l'unité

Oui  Non

Date de mise en place (approximatif)

\_\_\_\_\_  
(Date AA-MM-JJ)

Transfert à une unité différente (ex. principale, satellite)

Oui  Non

Date de mise en place (approximatif)

\_\_\_\_\_  
(Date AA-MM-JJ)



### 3. PRÉCAUTIONS SPÉCIFIQUES CHEZ LES PATIENTS AVEC COVID-19 SUSPECTÉ (page 4 sur 4)

#### Indiquez les stratégies utilisées

(svp cochez toutes les réponses qui s'appliquent)

Horaire de traitement séparé afin de regrouper les cas de COVID suspectés  Oui  Non

Date de mise en place (approximatif)

\_\_\_\_\_  
(Date AA-MM-JJ)

Transport adapté séparé  Oui  Non

Date de mise en place (approximatif)

\_\_\_\_\_  
(Date AA-MM-JJ)

Changement du ratio patient : personnel médical  Oui  Non

Date de mise en place (approximatif)

\_\_\_\_\_  
(Date AA-MM-JJ)

Autres mesures prises pour les précautions spécifiques chez les patients avec COVID-19 suspecté. SVP précisez.

\_\_\_\_\_

Date de mise en place (approximatif)

\_\_\_\_\_  
(Date AA-MM-JJ)

#### 4. PRÉCAUTIONS SPÉCIFIQUES CHEZ LES PATIENTS AVEC COVID-19 CONFIRMÉ (page 1 sur 4)

##### Indiquez les stratégies utilisées

(svp cochez toutes les réponses qui s'appliquent) :

Précautions gouttelettes/contact avec protection oculaire  Oui  Non

Date de mise en place (approximatif)

\_\_\_\_\_  
(Date AA-MM-JJ)

Port du masque en continu pour tous les patients avec COVID confirmés  Oui  Non

Date de mise en place (approximatif)

\_\_\_\_\_  
(Date AA-MM-JJ)

Distanciation physique simple dans les zones d'attente  Oui  Non

Date de mise en place (approximatif)

\_\_\_\_\_  
(Date AA-MM-JJ)

Distanciation physique simple dans les zones de traitement  Oui  Non

Date de mise en place (approximatif)

\_\_\_\_\_  
(Date AA-MM-JJ)

Utilisation de barrières physiques (ex. rideau, paravent, Plexiglass, etc.)  Oui  Non

Date de mise en place (approximatif)

\_\_\_\_\_

(Date AA-MM-JJ)

#### 4. PRÉCAUTIONS SPÉCIFIQUES CHEZ LES PATIENTS AVEC COVID-19 CONFIRMÉ (page 2 sur 4)

##### Indiquez les stratégies utilisées

(svp cochez toutes les réponses qui s'appliquent) :

Salles individuelles à pression négative  Oui  Non

Date de mise en place (approximatif)

\_\_\_\_\_  
(Date AA-MM-JJ)

Salles individuelles, mais sans pression négative  Oui  Non

Date de mise en place (approximatif)

\_\_\_\_\_  
(Date AA-MM-JJ)

Secteurs d'hémodialyse séparés  Oui  Non

Date de mise en place (approximatif)

\_\_\_\_\_  
(Date AA-MM-JJ)

#### 4. PRÉCAUTIONS SPÉCIFIQUES CHEZ LES PATIENTS AVEC COVID-19 CONFIRMÉ (page 3 sur 4)

##### Indiquez les stratégies utilisées

(svp cochez toutes les réponses qui s'appliquent) :

Transfert à la zone chaude de l'unité

Oui  Non

Date de mise en place (approximatif)

\_\_\_\_\_  
(Date AA-MM-JJ)

Transfert à une unité différente (ex. principale, satellite)

Oui  Non

Date de mise en place (approximatif)

\_\_\_\_\_  
(Date AA-MM-JJ)

#### 4. PRÉCAUTIONS SPÉCIFIQUES CHEZ LES PATIENTS AVEC COVID-19 CONFIRMÉ (page 4 sur 4)

##### Indiquez les stratégies utilisées

(svp cochez toutes les réponses qui s'appliquent) :

Horaire de traitement séparé afin de regrouper les cas de COVID suspectés  Oui  Non

Date de mise en place (approximatif)

\_\_\_\_\_  
(Date AA-MM-JJ)

Transport adapté séparé  Oui  Non

Date de mise en place (approximatif)

\_\_\_\_\_  
(Date AA-MM-JJ)

Changement du ratio patient : personnel médical  Oui  Non

Date de mise en place (approximatif)

\_\_\_\_\_  
(Date AA-MM-JJ)

Autres mesures prises pour les précautions spécifiques chez les patients avec COVID-19 confirmé. SVP Précisez

\_\_\_\_\_

Date de mise en place (approximatif)

\_\_\_\_\_  
(Date AA-MM-JJ)

## 5. FAISABILITÉ

De façon générale, considérez-vous que les patients entre eux peuvent garder une distance de 2m sur l'unité d'hémodialyse ?

Oui  Non  Partiellement

Précisez pourquoi

De façon générale, considérez-vous que les patients et l'équipe traitante peuvent garder une distance de 2m sur l'unité d'hémodialyse ? (ne pas tenir compte de la période de branchement/débranchement)

-----  
Oui Non Partiellement

Précisez pourquoi

De façon générale, considérez-vous que l'équipe traitante applique les précautions contre la transmission par gouttelettes/contact avec protection oculaire de manière appropriée et sécuritaire ?

-----  
Oui Non Partiellement

De façon générale, considérez-vous que les équipements de protection individuelle (ÉPI) et d'hygiène étaient accessibles en tout temps ?

-----  
Oui Non Partiellement

-----

## 6. PRATIQUE ACTUELLE

---

Actuellement, appliquez-vous les mêmes précautions

telles que mentionnées ci-dessus ou avez-vous apporté des changements à votre pratique en fonction de l'évolution de l'épidémie de COVID ? Si vous avez apporté des changements, lesquels et pourquoi ?

---
