# Supplementary material for: Infection control measures to prevent outbreaks of COVID-19 in Quebec hemodialysis units: a cross-sectional survey
Source: PubMed Central journal article supplement — CMAJ Open. 2021 Dec 21;9(4):E1232–41. doi: 10.9778/cmajo.20210102 (PMC8695531; doi:10.9778/cmajo.20210102), 2021-12-21
Supplement: open-2021-0102-original-submission.pdf [file open-2021-0102-original-submission.pdf]

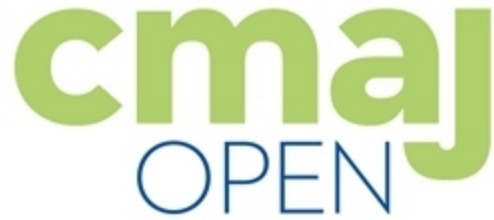

**Feasibility of infection control measures in hemodialysis units to prevent outbreaks of COVID-19: An empiric province-wide study from Quebec**

|                               |                                                                                                                                                                                                                                                                                                                                                                                                                                                                                                                                                                                                                                                                                                                                                                                                                                                                                                                                                                                                                                                                                                    |
|-------------------------------|----------------------------------------------------------------------------------------------------------------------------------------------------------------------------------------------------------------------------------------------------------------------------------------------------------------------------------------------------------------------------------------------------------------------------------------------------------------------------------------------------------------------------------------------------------------------------------------------------------------------------------------------------------------------------------------------------------------------------------------------------------------------------------------------------------------------------------------------------------------------------------------------------------------------------------------------------------------------------------------------------------------------------------------------------------------------------------------------------|
| Journal:                      | <i>CMAJ Open</i>                                                                                                                                                                                                                                                                                                                                                                                                                                                                                                                                                                                                                                                                                                                                                                                                                                                                                                                                                                                                                                                                                   |
| Manuscript ID                 | CMAJOpen-2021-0102                                                                                                                                                                                                                                                                                                                                                                                                                                                                                                                                                                                                                                                                                                                                                                                                                                                                                                                                                                                                                                                                                 |
| Manuscript Type:              | Descriptive                                                                                                                                                                                                                                                                                                                                                                                                                                                                                                                                                                                                                                                                                                                                                                                                                                                                                                                                                                                                                                                                                        |
| Date Submitted by the Author: | 24-Apr-2021                                                                                                                                                                                                                                                                                                                                                                                                                                                                                                                                                                                                                                                                                                                                                                                                                                                                                                                                                                                                                                                                                        |
| Complete List of Authors:     | Beaubien-Souigny, William; Centre Hospitalier de l'Universite de Montreal, Medicine<br>Nadeau-Fredette, Annie-Claire; Hôpital Maisonneuve-Rosemont, Medicine; Université de Montréal, Madicine<br>Nguyen, Marie-Noël; Centre Hospitalier de l'Universite de Montreal, Medicine<br>Rios, Norka; Research Institute of the McGill University Health Centre<br>Caron, Marie-Line; Centre de Recherche du CHUM, recherche<br>Tom, Alexander; Research Institute of the McGill University Health Centre, Nephrology<br>Suri, Rita; Research Institute of the McGill University Health Centre, Medicine (Nephrology)                                                                                                                                                                                                                                                                                                                                                                                                                                                                                     |
| More Detailed Keywords:       | COVID-19, Infection prevention and control, Hemodialysis                                                                                                                                                                                                                                                                                                                                                                                                                                                                                                                                                                                                                                                                                                                                                                                                                                                                                                                                                                                                                                           |
| Keywords:                     | Infectious diseases, Nephrology, Epidemiology                                                                                                                                                                                                                                                                                                                                                                                                                                                                                                                                                                                                                                                                                                                                                                                                                                                                                                                                                                                                                                                      |
| Abstract:                     | <p>Background: In-center hemodialysis units pose the perfect conditions for COVID-19 transmission yet limited space and resources are obstacles to infection prevention and control (IPAC) measures. We aimed to describe IPAC measures implemented in Quebec and document the infection rates within hemodialysis units during the first year of the COVID-19 pandemic.</p> <p>Methods: We invited leaders of Quebec’s hemodialysis units to collect information on IPAC measures from March 1st to June 30th 2020 and dialysis unit characteristics. Participating units were contacted again in March 2021 to collect information about the total number of COVID-19 cases. The cumulative infection rate of each unit was compared to the regional cumulative infection rate using standardized infection ratio (SIR).</p> <p>Results: Data was obtained from 38 units, representing 90% of Quebec’s hemodialysis patients. 30% of units were perceived as crowded, and this was associated with objective distance measures between stations. IPAC measures regarding general prevention,</p> |

1  
2  
3  
4  
5  
6  
7  
8  
9  
10  
11  
12  
13  
14  
15  
16  
17  
18  
19  
20  
21  
22  
23  
24  
25  
26  
27  
28  
29  
30  
31  
32  
33  
34  
35  
36  
37  
38  
39  
40  
41  
42  
43  
44  
45  
46  
47  
48  
49  
50  
51  
52  
53  
54  
55  
56  
57  
58  
59  
60

|  |                                                                                                                                                                                                                                                                                                                                                                                                                                                                                                                                                                                                                                                                                                                                           |
|--|-------------------------------------------------------------------------------------------------------------------------------------------------------------------------------------------------------------------------------------------------------------------------------------------------------------------------------------------------------------------------------------------------------------------------------------------------------------------------------------------------------------------------------------------------------------------------------------------------------------------------------------------------------------------------------------------------------------------------------------------|
|  | <p>screening procedures, physical distancing, and PPE use were implemented in 50% of units by 3 weeks and the remainder by 6 weeks. Data on cumulative infection rate was obtained in 26 units providing care to 3942 patients. The cumulative infection rate was disproportionately elevated in hemodialysis units compared to regional rates (Median SIR: 2.68 IQR: 1.58; 4.45). No difference was noted in the SIR related to specific IPAC measures or to physical characteristics of the units.</p> <p>Interpretation: Hemodialysis units throughout Quebec were able to rapidly implement modified IPAC measures. Despite this, cumulative infection rates were disproportionately elevated compared to the general population.</p> |
|  |                                                                                                                                                                                                                                                                                                                                                                                                                                                                                                                                                                                                                                                                                                                                           |

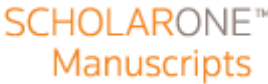

STROBE Statement—Checklist of items that should be included in reports of *cohort studies*

|                           | Item No | Recommendation                                                                                                                                                                                               |               |
|---------------------------|---------|--------------------------------------------------------------------------------------------------------------------------------------------------------------------------------------------------------------|---------------|
| <b>Title and abstract</b> | 1       | (a) Indicate the study's design with a commonly used term in the title or the abstract                                                                                                                       | p.1           |
|                           |         | (b) Provide in the abstract an informative and balanced summary of what was done and what was found                                                                                                          | p.2           |
| <b>Introduction</b>       |         |                                                                                                                                                                                                              |               |
| Background/rationale      | 2       | Explain the scientific background and rationale for the investigation being reported                                                                                                                         | p. 3          |
| Objectives                | 3       | State specific objectives, including any prespecified hypotheses                                                                                                                                             |               |
| <b>Methods</b>            |         |                                                                                                                                                                                                              |               |
| Study design              | 4       | Present key elements of study design early in the paper                                                                                                                                                      | p. 3          |
| Setting                   | 5       | Describe the setting, locations, and relevant dates, including periods of recruitment, exposure, follow-up, and data collection                                                                              | p.3           |
| Participants              | 6       | (a) Give the eligibility criteria, and the sources and methods of selection of participants. Describe methods of follow-up                                                                                   | units, p.3    |
|                           |         | (b) For matched studies, give matching criteria and number of exposed and unexposed                                                                                                                          | NA            |
| Variables                 | 7       | Clearly define all outcomes, exposures, predictors, potential confounders, and effect modifiers. Give diagnostic criteria, if applicable                                                                     | p.4, appendix |
| Data sources/measurement  | 8*      | For each variable of interest, give sources of data and details of methods of assessment (measurement). Describe comparability of assessment methods if there is more than one group                         |               |
| Bias                      | 9       | Describe any efforts to address potential sources of bias                                                                                                                                                    | p.4           |
| Study size                | 10      | Explain how the study size was arrived at                                                                                                                                                                    | p.5           |
| Quantitative variables    | 11      | Explain how quantitative variables were handled in the analyses. If applicable, describe which groupings were chosen and why                                                                                 | p.4           |
| Statistical methods       | 12      | (a) Describe all statistical methods, including those used to control for confounding                                                                                                                        |               |
|                           |         | (b) Describe any methods used to examine subgroups and interactions                                                                                                                                          | p.4           |
|                           |         | (c) Explain how missing data were addressed                                                                                                                                                                  |               |
|                           |         | (d) If applicable, explain how loss to follow-up was addressed                                                                                                                                               |               |
|                           |         | (e) Describe any sensitivity analyses                                                                                                                                                                        |               |
| <b>Results</b>            |         |                                                                                                                                                                                                              |               |
| Participants              | 13*     | (a) Report numbers of individuals at each stage of study—eg numbers potentially eligible, examined for eligibility, confirmed eligible, included in the study, completing follow-up, and analysed            | p.5           |
|                           |         | (b) Give reasons for non-participation at each stage                                                                                                                                                         | p.5           |
|                           |         | (c) Consider use of a flow diagram                                                                                                                                                                           | NA            |
| Descriptive data          | 14*     | (a) Give characteristics of study participants (eg demographic, clinical, social) and information on exposures and potential confounders                                                                     | Table 1       |
|                           |         | (b) Indicate number of participants with missing data for each variable of interest                                                                                                                          |               |
|                           |         | (c) Summarise follow-up time (eg, average and total amount)                                                                                                                                                  |               |
| Outcome data              | 15*     | Report numbers of outcome events or summary measures over time                                                                                                                                               | Figure 2, p7  |
| Main results              | 16      | (a) Give unadjusted estimates and, if applicable, confounder-adjusted estimates and their precision (eg, 95% confidence interval). Make clear which confounders were adjusted for and why they were included | NA            |
|                           |         | (b) Report category boundaries when continuous variables were categorized                                                                                                                                    | Table 1       |
|                           |         | (c) If relevant, consider translating estimates of relative risk into absolute risk for a meaningful time period                                                                                             | Figure 2      |

|    |                          |    |                                                                                                                                                                            |                       |
|----|--------------------------|----|----------------------------------------------------------------------------------------------------------------------------------------------------------------------------|-----------------------|
| 1  | Other analyses           | 17 | Report other analyses done—eg analyses of subgroups and interactions, and sensitivity analyses                                                                             | All analysis reported |
| 2  |                          |    |                                                                                                                                                                            |                       |
| 3  |                          |    |                                                                                                                                                                            |                       |
| 4  | <b>Discussion</b>        |    |                                                                                                                                                                            |                       |
| 5  | Key results              | 18 | Summarise key results with reference to study objectives                                                                                                                   |                       |
| 6  | Limitations              | 19 | Discuss limitations of the study, taking into account sources of potential bias or imprecision. Discuss both direction and magnitude of any potential bias                 | p.7                   |
| 7  |                          |    |                                                                                                                                                                            |                       |
| 8  | Interpretation           | 20 | Give a cautious overall interpretation of results considering objectives, limitations, multiplicity of analyses, results from similar studies, and other relevant evidence | p.8                   |
| 9  |                          |    |                                                                                                                                                                            |                       |
| 10 | Generalisability         | 21 | Discuss the generalisability (external validity) of the study results                                                                                                      | p.8                   |
| 11 |                          |    |                                                                                                                                                                            |                       |
| 12 | <b>Other information</b> |    |                                                                                                                                                                            |                       |
| 13 | Funding                  | 22 | Give the source of funding and the role of the funders for the present study and, if applicable, for the original study on which the present article is based              | p.9                   |
| 14 |                          |    |                                                                                                                                                                            |                       |
| 15 |                          |    |                                                                                                                                                                            |                       |
| 16 |                          |    |                                                                                                                                                                            |                       |
| 17 |                          |    |                                                                                                                                                                            |                       |

\*Give information separately for exposed and unexposed groups.

**Note:** An Explanation and Elaboration article discusses each checklist item and gives methodological background and published examples of transparent reporting. The STROBE checklist is best used in conjunction with this article (freely available on the Web sites of PLoS Medicine at <http://www.plosmedicine.org/>, Annals of Internal Medicine at <http://www.annals.org/>, and Epidemiology at <http://www.epidem.com/>). Information on the STROBE Initiative is available at <http://www.strobe-statement.org>.

1  
2 **Feasibility of infection control measures in hemodialysis units to prevent outbreaks of COVID-19:**  
3 **An empiric province-wide study from Quebec**  
4

5 **Short title: Infection control measures in hemodialysis units**  
6

7 **Authors:**

8 William Beaubien-Souligny MD PhD (1,2), Annie-Claire Nadeau-Fredette MD MSc (3,4), Marie-Noel  
9 Nguyen MD (1), Norka Rios RN MScA (5), Marie-Line Caron B.Sc. (2), Alexander Tom BSc (5,6), Rita S.  
10 Suri MD MSc (2,5,6); on behalf of the Quebec Renal Network COVID-19 Study Investigators  
11  
12

13  
14 **Affiliations:**

- 15 1. Division of Nephrology, Centre hospitalier de l'Université de Montréal, Montréal, Québec, Canada  
16 2. Centre de Recherche du Centre hospitalier de l'Université de Montréal, Montréal, Québec, Canada  
17 3. Division of nephrology, Hôpital Maisonneuve-Rosemont, Montréal, Québec, Canada  
18 4. Research Center of the Hôpital Maisonneuve-Rosemont, Montréal, Québec, Canada  
19 5. Research Institute of the McGill University Health Center  
20 6. Division of Nephrology, Department of Medicine, McGill University  
21  
22  
23

24 **Correspondence:**

25 Rita S. Suri, [rita.suri@mcgill.ca](mailto:rita.suri@mcgill.ca)

26 William Beaubien-Souligny, [William.beaubien-souligny@umontreal.ca](mailto:William.beaubien-souligny@umontreal.ca)  
27  
28

29 **Relevant Conflicts of Interest:** None  
30  
31

32 **Acknowledgements:**

33 RSS and ACNF are supported by Fonds de Recherche du Quebec – Santé Clinician-Researcher Awards.  
34 WBS is supported by Fonds de Recherche du Quebec – training award. We would like to thank all the  
35 nursing managers and dialysis unit directors who provided data for this study. A list of QRN  
36 investigators can be found in supplementary appendix 1.  
37  
38  
39

40 **Word Count: 2410**  
41  
42  
43  
44  
45  
46  
47  
48  
49  
50  
51  
52  
53  
54  
55  
56  
57  
58  
59  
60

1  
2  
3  
4  
5  
6  
7  
8  
9  
10  
11  
12  
13  
14  
15  
16  
17  
18  
19  
20  
21  
22  
23  
24  
25  
26  
27  
28  
29  
30  
31  
32  
33  
34  
35  
36  
37  
38  
39  
40  
41  
42  
43  
44  
45  
46  
47  
48  
49  
50  
51  
52  
53  
54  
55  
56  
57  
58  
59  
60

## **Feasibility of infection control measures in hemodialysis units to prevent outbreaks of COVID-19: A descriptive province-wide study from Quebec**

**Short title: Infection control measures in hemodialysis units**

### **Abstract:**

**Background:** In-center hemodialysis units pose the perfect conditions for COVID-19 transmission yet limited space and resources are obstacles to infection prevention and control (IPAC) measures. We aimed to describe IPAC measures implemented in Quebec and document the infection rates within hemodialysis units during the first year of the COVID-19 pandemic.

**Methods:** We invited leaders of Quebec's hemodialysis units to collect information on IPAC measures from March 1<sup>st</sup> to June 30<sup>th</sup> 2020 and dialysis unit characteristics. Participating units were contacted again in March 2021 to collect information about the total number of COVID-19 cases. The cumulative infection rate of each unit was compared to the regional cumulative infection rate using standardized infection ratio (SIR).

**Results:** Data was obtained from 38 units, representing 90% of Quebec's hemodialysis patients. 30% of units were perceived as crowded, and this was associated with objective distance measures between stations. IPAC measures regarding general prevention, screening procedures, physical distancing, and PPE use were implemented in 50% of units by 3 weeks and the remainder by 6 weeks. Data on cumulative infection rate was obtained in 26 units providing care to 3942 patients. The cumulative infection rate was disproportionally elevated in hemodialysis units compared to regional rates (Median SIR: 2.68 IQR: 1.58; 4.45). No difference was noted in the SIR related to specific IPAC measures or to physical characteristics of the units.

**Interpretation:** Hemodialysis units throughout Quebec were able to rapidly implement modified IPAC measures. Despite this, cumulative infection rates were disproportionally elevated compared to the general population.

## Introduction:

Since March 2020, the COVID-19 pandemic has completely disrupted the lives of Canadians, but for the 24,000 vulnerable Canadians receiving in-center hemodialysis<sup>1</sup>, its effects are especially grave. Case-fatality rates from COVID-19 are reported at 20 to 30% in hemodialysis patients – ten times the general population<sup>2-8</sup>. Yet self-isolation to avoid exposure is impossible. Most patients must leave their homes 3 times a week to receive their life-saving treatments. Each treatment is typically performed for 3-5 hours in an open space shared with several other patients, and involves frequent health-care worker contact. Exposure to COVID-19 may also occur during transport, and in the waiting area before and after dialysis. Outbreaks of COVID-19 within hemodialysis units can have disastrous consequences<sup>9,10</sup>. While the risk of outbreaks in dialysis was recognized early on during the pandemic<sup>9</sup>, implementation of strict infection prevention and control (IPAC) measures in hemodialysis units is challenging. Most North American installations were not originally designed with the objective of preventing respiratory virus transmission. Many are crowded with minimal distance between treatment stations, poor ventilation, and few, if any, single patient rooms.

Quebec was the first Canadian province to experience intense community transmission of COVID-19. While several experts' panels had issued recommendations on outbreak prevention strategies for hemodialysis units<sup>11-14</sup>, to what extent and how rapidly these could be rapidly implemented was unclear. We empirically assessed the type, timing, and feasibility of IPAC measures implemented in hemodialysis units in Quebec. We hypothesized that IPAC measures were implemented rapidly but that the ability of local leaders to implement physical distancing measures would be dependent on the crowdedness of each unit, and that standardized infection rates would be higher in more crowded units with less single patient rooms.

## Methods:

### *Data Collection Strategy:*

On July 15<sup>th</sup> 2020, we invited nurse managers and/or dialysis unit directors from all of Quebec's 54 hemodialysis units to complete an electronic questionnaire regarding specific IPAC measures deployed at their institutions. Nephrologists and nursing managers from these units had been keeping documentation on this since early May at our request. Up to two email reminders were sent to centers who did not initially respond. Clarifications were sought in cases of incomplete answers or major data discrepancies. Data collection was considered complete by August 31, 2020. As no personal or patient-related information was collected, ethics review was waived.

### *Data Collection Tool:*

1  
2 A questionnaire was designed by 4 nephrologists directly involved in outbreak prevention  
3 efforts at their institutions. We asked questions about the physical characteristics of each unit, which  
4 IPAC measures were implemented from March 1 – June 30 2020, provider perception of crowdedness  
5 and adherence to IPAC measures. We divided IPAC measures into 4 themes: screening procedures,  
6 physical distancing measures, personal protective equipment (PPE) use, and other general measures.  
7 We asked which measures were applied to: all patients; high-risk patients (residents of long-term care  
8 facilities, returning travelers, recently hospitalised patients); and patients with suspected/confirmed  
9 COVID-19. The questionnaire was tested for clarity and face validity iteratively by its creators and two  
10 research coordinators. Items considered unclear by  $\geq 1$  reviewer were revised and the questionnaire  
11 re-tested until all reviewers agreed it was adequate. Study data were collected and managed using  
12 REDCap) electronic data capture tools hosted at the coordinating centre<sup>15,16</sup>.

### 13 14 15 16 17 18 19 *Follow-up data collection of infection rates:*

20  
21  
22 In April 2021, units were individually contacted to collect information about the total number of  
23 infections documented from March 1<sup>st</sup> 2020 to March 31<sup>st</sup> 2021 and the current number of patients  
24 undergoing in-center hemodialysis in their unit. At least two contact attempts were made. Cumulative  
25 infection rates up to March 31<sup>st</sup> 2021 in each of Quebec Health regions were collected from publicly  
26 available data produced by *the Institut de Santé Publique du Québec (INSPQ)*.

### 27 28 29 30 31 *Statistics:*

32  
33  
34 The primary objective was descriptive in nature. No sample size calculation were performed  
35 since we aimed to include all of Quebec HD units. Categorical variables are presented as number (%)  
36 and continuous variables are presented as median (SD) or median [interquartile range (IQR)].

37  
38  
39  
40  
41  
42  
43  
44  
45  
46  
47  
48  
49  
50  
51  
52  
53  
54  
55  
56  
57  
58  
59  
60  
Dialysis unit characteristics and IPAC measures were compared between units reported as  
overcrowded vs. not crowded using Chi squared or Fisher's exact (if cell count were  $< 5$ ) for categorical  
variables, and Student's t- or Mann U Whitney-test (in case of non-normal distribution after  
examination of Q-Q plot) for continuous variables.

Expected infection rates in each unit were calculated by multiplying the regional infection rate  
to the number of patients in each unit. The ratio of the actual infection rate to the expected infection  
rate, the standardized infection ratio (SIR), is presented with 95% confidence intervals. Differences in  
SIR according to unit characteristics and deployed IPAC measures were assessed using Mann U  
Whitney-test. Spearman correlation were used to assess the relationship between SIR and both the unit  
size defined as the number of patients receiving HD treatment at the studied units and the number of  
isolation rooms available at the units. A significance level of  $p=0.05$  was used for all tests. All statistics  
were performed in SPSS version 25 (IBM, Armonk, New York).



## Results

### *Dialysis Unit Characteristics:*

Of Quebec's 54 dialysis units with almost 4800 patients, the managers of 38 (70%) completed surveys representing >4300 patients (~90%). There was wide variation in the number of treated patients (range 8-380, median 86) and treatment stations (range 4-70, median 20) (**Table 1**). Thirteen units (34%) were operating at  $\geq 90\%$  of their capacity, and this correlated with unit size ( $r=0.61$   $p<0.001$ ) (Supplemental **Figure S1**).

Over 30% and 40% of respondents reported their treatment area or waiting room was crowded, respectively. Importantly, the perception of crowdedness correlated with an objective measurement of <2 m between dialysis stations or waiting room chairs (**Table 1**). There was no relationship between crowdedness and % filled capacity. While 92% of units had at least one regular isolation room (median 3), in only 32% were any of these rooms equipped with negative pressure ventilation (range 0-4).

### *Frequency of Specific IPAC Measures:*

The frequency of specific IPAC measures in Quebec's hemodialysis units are given in **Table 2**. Strict screening procedures including a symptoms questionnaire and taking patients' temperature on arrival were implemented almost universally. Most units (74%) had set up a separate triage post for this purpose. While most units (82%) encouraged patients to inform the dialysis unit in advance if they were experiencing symptoms, few units (37%) routinely called patients the day before. Very few units (<10%) performed regular surveillance testing for SARS-CoV-2 by nasopharyngeal swab for all patients, but 64% of units did so for high-risk patients from long-term care facilities and other group living situations.

Most (71%) units installed plexiglass, or other physical barriers between dialysis stations, while 55% reorganized the dialysis chairs to create more space between them; notably only 40% of units with <2 m between dialysis chairs were able to do so. All units reported that patients with suspected or confirmed COVID-19 would be isolated in some manner. Most (92%) units dialyzed these patients in single patient rooms, while smaller satellite centers would transfer them to the main center that was better equipped. Only 18% of units reported having to decrease dialysis frequency to ensure adequate physical distancing was maintained between patients during treatments.

Interestingly, PPE use was not universal during the first phase of the pandemic. Procedure masks were worn at all times by staff in 100% of units, but staff visors were worn only when caring for suspected, positive, or high-risk patients in most units. In contrast, patients were not required to wear masks except if they were suspected or proven to have COVID-19.

1  
2 Compared to other regions, more dialysis units located in the Greater Montreal Region (GMR)  
3 implemented specific IPAC measures for high-risk groups (Table 2). These measures included dialyzing  
4 high-risk patients in a dedicated zone or shift (100% vs 46%,  $p=0.001$ ) and using full droplet and contact  
5 precautions (100% vs 65.4%  $p=0.036$ ). The rate of systematic PCR testing for COVID-19 in high-risk  
6 patients did not differ between units in the GMR vs. outside of it (35% vs 29.1%,  $p=0.73$ ).  
7  
8  
9

### 10 11 12 13 *Feasibility of IPAC Measures and Impact of Crowdedness*

14  
15  
16 Only 8% of units reported that physical distancing measures could not be easily maintained in  
17 their units; 69% and 23% reported that measures were easily implemented all or part of the time,  
18 respectively. Almost 90% of reported that their access to PPE use was adequate. There were no  
19 significant differences between the rate of adoption of IPAC measures between units with “crowded”  
20 vs “non-crowded” treatment areas (Table 2).  
21  
22  
23

### 24 *Timing of IPAC Measures and Outbreaks*

25  
26  
27 By July 15<sup>th</sup>, 2020, ~5% of Quebec’s almost 5000 hemodialysis patients had tested positive for  
28 COVID-19 (*personal communications with 98% of Quebec’s dialysis unit directors*). The majority of  
29 these were from the GMR, mirroring the provincial experience during the first phase (Figure 1A). The  
30 most common IPAC measures (>85% of units) were implemented in all hemodialysis units within 6  
31 weeks of the first documented case in Quebec province (Figure 1B); 50% of these units had  
32 implemented these measures by 3 weeks, at the time where a rapid increase in COVID-19 cases in the  
33 GMR was observed.  
34  
35  
36  
37  
38  
39

### 40 *Cumulative infection rate during the first year of the pandemic*

41  
42  
43 Follow-up data was obtained in 26 centers providing care to 3942 hemodialysis patients as of  
44 March 31<sup>st</sup> 2021 in 8 different health regions. Documented infection rate varied from 0% to 50%  
45 (Median: 10.4% IQR: 5.1%; 20.5%) (Figure 2A). When compared to regional cumulative infection rate,  
46 22/26 (84.6%) units showed standardized infection ratio >1 (Median SIR: 2.68, IQR: 1.58; 4.45) (Figure  
47 2B).  
48  
49  
50

51  
52 No statistical difference in SIR was observed according to physical distance between HD chairs  
53 (<2m: Median: 4.40 [IQR: 2.98; 4.86] vs ≥2m: Median: 2.25 [IQR: 1.31; 3.48]  $p=0.07$ ) or reported unit  
54 crowdedness (Crowded: Median: 3.70 [IQR: 2.27; 4.86] vs Not crowded: 2.48 [IQR: 1.31; 4.17]  $p=0.28$ ).  
55 Similarly, no difference in SIR was seen according to specific IPAC measures (Supplementary table 1),  
56  
57  
58  
59  
60

1  
2 and no association were observed between SIR and the number of patients treated at each center  
3 (r=0.21, p=0.32) or number of isolation rooms per centre (r=0.16, p=0.45).  
4  
5

## 6 7 **Interpretation** 8

9  
10 In this study, we found that local leaders in Quebec's hemodialysis unit were able to rapidly and  
11 successfully implement recommended IPAC measures in the spring of 2020, whether they were  
12 crowded or not. Most measures were implemented within 3 weeks of the World Health Organization's  
13 pandemic declaration<sup>17</sup>; the remaining measures were implemented by 6 weeks. Despite rapid and  
14 universal adoption of IPAC measures, we observed that the infection rate in most hemodialysis units  
15 remained elevated compared to regional infection rates.  
16  
17  
18

19  
20 Hemodialysis units pose the perfect opportunity for transmission of airborne and droplet  
21 infections, with potentially disastrous consequences. There is often limited space for large numbers of  
22 patients who must spend 3-4 hours in close proximity<sup>12</sup>, often in spaces with poor ventilation<sup>18</sup>. Early  
23 during the pandemic, expert groups published multiple recommendations on how to avoid outbreaks  
24 in hemodialysis units<sup>11-14</sup>. However, whether these strict screening, physical distancing, and isolation  
25 measures could feasibly be implemented in crowded units at full capacity with limited space and  
26 resources was highly uncertain and the fear of outbreaks high.  
27  
28  
29

30  
31 In terms of specific IPAC measures, we found that implementation of hand hygiene, disinfection  
32 of surfaces, and mask use was universal. During the first wave, the use of visors was restricted in some  
33 units perhaps due to perceived lack of importance or shortages, but now practices have evolved such  
34 that anyone directly caring for patients wears ocular protection in addition to masks<sup>19</sup>. Contrary to our  
35 original hypothesis, physical distancing IPAC measures were feasibly implemented, whether the dialysis  
36 unit was perceived as crowded or not. Space restrictions and other limitations may have prompted the  
37 use of alternative solutions such as the installation of plexiglass barriers, or modification to the dialysis  
38 schedule. Similar adaptations have been reported in centres outside Quebec<sup>20</sup>. Fortunately, major  
39 changes in the model of care such as by reducing dialysis frequency, a strategy reported in other  
40 countries<sup>21</sup>, were rarely needed in Quebec. It is also important to note that confirmed COVID-19  
41 patients were rarely dialyzed in negative pressure isolation rooms as some have recommended<sup>18</sup>, as  
42 only 32% of units were equipped with them.  
43  
44  
45  
46  
47  
48

49  
50 Screening and triage measures were universally deployed to identify infected patients, and most  
51 units in the GMR area where community prevalence was high implemented special measures for high-  
52 risk patients including those living in long-term care facilities or other group living situations.  
53 Conversely, regular nasopharyngeal testing for SARS-CoV-2 in all asymptomatic high-risk patients was  
54 not commonly implemented during the first months of the pandemic, although it may have been more  
55 frequent following a recommendation from *Institut national de santé et services sociaux* (INESSS) in  
56  
57  
58

1  
2 September 2020. Notably, this “surveillance” testing approach may be important to curb spread during  
3 outbreaks<sup>10</sup>.  
4  
5

6 It remains unknown if the high observed SIRs are related to transmission occurring in the unit,  
7 or in the living environment of the patient. A recent paper documenting outcomes of SARS-CoV-2  
8 infection in long-term dialysis recipients in Ontario up to August 20<sup>th</sup> 2020 reported that individual risk  
9 factor for infection included residence in long-term care facilities, residence in the greater Toronto  
10 region and non-white ethnicities and lower income quartiles<sup>8</sup>. In this work, a cumulative infection rate  
11 of 1.5%<sup>8</sup> was reported at a time when the cumulative infection in Ontario rate was approximately  
12 0.28%. However, there was no comparison between specific unit infection rate and regional infection  
13 rate. In our work, we confirm that infection rate in HD unit remain disproportionately high when  
14 compared to regional infection rate.  
15  
16  
17  
18  
19

20 To our knowledge, this is the first comprehensive empiric study of IPAC strategies implemented  
21 in Canada in multiple centers from a single provincial health care jurisdiction. Data was obtained from  
22 units representing ~90% of dialysis patients in Canada’s 2<sup>nd</sup> largest province. All types of dialysis units  
23 are represented, including academic and community, urban and rural, large and small. In comparison  
24 with prior work<sup>8</sup>, we compared center infection rate to regional infection rate enabling a better  
25 appreciation of the heightened risk of infection in HD patients compared to the general population. We  
26 also recognize our study’s limitations. First, data collection relied on administrative records and  
27 testimony of local leaders responsible for IPAC measures at their respective units. Secondly, cumulative  
28 infection rates were only collected in a subset of participating centers and compared to the general  
29 population, which is likely to have a different age distribution. Finally, because the units of observation  
30 were dialysis centers and not individual patients, it was not possible to determine risk factors for  
31 infection.  
32  
33  
34  
35  
36  
37

### 38 *Conclusion*

39  
40  
41 We conclude that hemodialysis units throughout Quebec were able to rapidly implement IPAC  
42 measures during the first months of the pandemic. Despite these measures, the infection rate within  
43 dialysis unit remain high compared to the general population. Our study also suggests IPAC measures  
44 should continue until the hemodialysis population develops acquired immunity to COVID-19, and may  
45 also be relevant during future epidemics of viral respiratory illnesses.  
46  
47  
48  
49

50 **Data-Sharing Statement:** Data available on request from the authors  
51

52 **Funding information:** This study was funded by a Canadian Institutes of Health Research Rapid Funding  
53 Opportunity COVID-19 Grant.  
54  
55  
56  
57  
58  
59  
60

## References

1. Information ClfH. Annual Statistics on Organ Replacement in Canada: Dialysis, Transplantation and Donation, 2008 to 2017. 2018.
2. Bell S, Campbell J, McDonald J, et al. COVID-19 in patients undergoing chronic kidney replacement therapy and kidney transplant recipients in Scotland: findings and experience from the Scottish renal registry. *BMC Nephrol.* 2020;21:419.
3. De Meester J, De Bacquer D, Naesens M, Meijers B, Couttenye MM, De Vriese AS. Incidence, Characteristics, and Outcome of COVID-19 in Adults on Kidney Replacement Therapy: A Regionwide Registry Study. *J Am Soc Nephrol.* 2020.
4. Jager KJ, Kramer A, Chesnaye NC, et al. Results from the ERA-EDTA Registry indicate a high mortality due to COVID-19 in dialysis patients and kidney transplant recipients across Europe. *Kidney Int.* 2020;98:1540-8.
5. Keller N, Chantrel F, Krummel T, et al. Impact of first-wave COroNaVirus disease 2019 infection in patients on haemodialysis in Alsace: the observational COVIDIAL study. *Nephrol Dial Transplant.* 2020;35:1338-411.
6. Tortonese S, Scriabine I, Anjou L, et al. COVID-19 in Patients on Maintenance Dialysis in the Paris Region. *Kidney Int Rep.* 2020;5:1535-44.
7. Weiss S, Bhat P, Del Pilar Fernandez M, Bhat JG, Coritsidis GN. COVID-19 Infection in ESKD: Findings from a Prospective Disease Surveillance Program at Dialysis Facilities in New York City and Long Island. *J Am Soc Nephrol.* 2020;31:2517-21.
8. Taji L, Thomas D, Oliver MJ, et al. COVID-19 in patients undergoing long-term dialysis in Ontario. *Cmaj.* 2021.
9. Mazzoleni L, Ghafari C, Mestrez F, et al. COVID-19 Outbreak in a Hemodialysis Center: A Retrospective Monocentric Case Series. *Can J Kidney Health Dis.* 2020;7:2054358120944298.
10. Yau K, Muller MP, Lin M, et al. COVID-19 Outbreak in an Urban Hemodialysis Unit. *Am J Kidney Dis.* 2020;76:690-5.e1.
11. Suri RS, Antonsen JE, Banks CA, et al. Management of Outpatient Hemodialysis During the COVID-19 Pandemic: Recommendations From the Canadian Society of Nephrology COVID-19 Rapid Response Team. *Can J Kidney Health Dis.* 2020;7:2054358120938564.
12. Kliger AS, Silberzweig J. Mitigating Risk of COVID-19 in Dialysis Facilities. *Clinical journal of the American Society of Nephrology : CJASN.* 2020;15:707-9.
13. Moura-Neto JA, Abreu AP, Delfino VDA, et al. Good Practice Recommendations from the Brazilian Society of Nephrology to Dialysis Units Concerning the Pandemic of the New Coronavirus (Covid-19). *J Bras Nefrol.* 2020;42:15-7.
14. Roper T, Kumar N, Lewis-Morris T, et al. Delivering Dialysis During the COVID-19 Outbreak: Strategies and Outcomes. *Kidney Int Rep.* 2020;5:1090-4.
15. Harris PA, Taylor R, Thielke R, Payne J, Gonzalez N, Conde JG. Research electronic data capture (REDCap)--a metadata-driven methodology and workflow process for providing translational research informatics support. *J Biomed Inform.* 2009;42:377-81.
16. Harris PA, Taylor R, Minor BL, et al. The REDCap consortium: Building an international community of software platform partners. *J Biomed Inform.* 2019;95:103208.
17. Organization WH. WHO Director-General's opening remarks at the media briefing on COVID-19-11 March 2020: Geneva, Switzerland; 2020.
18. Basile C, Combe C, Pizzarelli F, et al. Recommendations for the prevention, mitigation and containment of the emerging SARS-CoV-2 (COVID-19) pandemic in haemodialysis centres. *Nephrology, dialysis, transplantation : official publication of the European Dialysis and Transplant Association - European Renal Association.* 2020;35:737-41.

1  
2  
3  
4  
5  
6  
7  
8  
9  
10  
11  
12  
13  
14  
15  
16  
17  
18  
19  
20  
21  
22  
23  
24  
25  
26  
27  
28  
29  
30  
31  
32  
33  
34  
35  
36  
37  
38  
39  
40  
41  
42  
43  
44  
45  
46  
47  
48  
49  
50  
51  
52  
53  
54  
55  
56  
57  
58  
59  
60

19. Québec" Cslind. SRAS-CoV-2 : Port de la protection oculaire en milieux de soins en fonction des paliers d'alerte. 2020; <https://www.inspq.qc.ca/publications/3020-port-protection-oculaire-milieux-soins-covid19>. Accessed February 25th 2021, 2021.

20. Ibernón M, Bueno I, Rodríguez-Farré N, et al. The impact of COVID-19 in hemodialysis patients: Experience in a hospital dialysis unit. *Hemodial Int*. 2020.

21. Lodge MDS, Abeygunaratne T, Alderson H, et al. Safely reducing haemodialysis frequency during the COVID-19 pandemic. *BMC Nephrol*. 2020;21:532.

22. Québec" INdSPd. Données COVID-19 par région sociosanitaire. 2020; <https://www.inspq.qc.ca/covid-19/donnees/par-region>. Accessed 2020-12-17.

Confidential

#### Figure legend

**Figure 1:** Implementation of general preventive measures in the province of Quebec during the first phase of the COVID-19 pandemic. A) Location of participating hemodialysis units and number of confirmed cases per capita in each Quebec Health Regions as of June 1<sup>st</sup> 2020 according to data from the *Institut National de Santé Publique du Québec*<sup>22</sup>) B) Timing of implementation of the most common infection prevention measures in hemodialysis units in relationship to important COVID-19 events in Quebec. As shown, the most common preventive measures were largely implemented before May 1<sup>st</sup> 2020.

**Figure 2:** Cumulative infection rate in 26 hemodialysis units until March 31<sup>st</sup> 2021. A) Cumulative incidence rate in each unit (black bars) compared to cumulative incidence rate in corresponding Quebec health region (red line) according to data from the *Institut National de Santé Publique du Québec*<sup>22</sup>. B) Standardized infection ratio (SIR) in each hemodialysis unit with 95% confidence intervals. A SIR higher than 1 (blue line) indicates that the observed infection rate in the unit is higher than expected based of the infection rate observed in the respective Quebec health region.

Confidential



**Table 1:** Hemodialysis Unit Characteristics

|                                                    | All<br>(N=38) | "Crowded"<br>(N=12)* | "Not Crowded"<br>(N=26)* | p-value     |
|----------------------------------------------------|---------------|----------------------|--------------------------|-------------|
| Type of unit                                       |               |                      |                          |             |
| University-based                                   | 7 (18%)       | 1 (8.3%)             | 6 (23.1%)                | 0.40        |
| Community-based                                    | 31 (82%)      | 11 (91.7%)           | 20 (76.9%)               |             |
| No. patients treated per week                      | 86 (32; 138)  | 58 (38; 138)         | 88 (24; 150)             | 0.89        |
| No. dialysis treatment stations                    | 19 (10; 27)   | 16 (11; 25)          | 21 (8; 40)               | 0.63        |
| No. separate sectors in the unit                   | 1 (1; 3)      | 1 (1; 2)             | 2 (1; 4)                 | 0.51        |
| No. patients per sector                            | 43 (7; 257)   | 44 (30; 61)          | 40 (19; 71)              | 0.65        |
| At >90% filled capacity                            | 13 (34%)      | 4 (33.3%)            | 9 (34.6%)                | 0.94        |
| Patient to nurse ratio                             | 3 (3; 4)      | 3 (3; 3)             | 4 (3; 4)                 | <b>0.02</b> |
| Patient to PSW ratio                               | 9 (7; 10)     | 9 (6; 11)            | 9 (7; 10)                | 0.82        |
| No. isolation rooms                                | 2 (1; 4)      | 2 (2; 3)             | 2 (1; 4)                 | 0.63        |
| Ratio of all dialysis stations to isolation rooms  | 8 (5; 10)     | 9 (6; 10)            | 8 (5; 10)                | 0.93        |
| No. negative pressure ventilation rooms            | 0 (0; 2)      | 0 (0; 2)             | 0 (0; 1)                 | 0.57        |
| Distance between treatment stations (N, %)         |               |                      |                          |             |
| <1 meter                                           | 1 (2.6%)      | 1 (8.3%)             | 0 (0%)                   |             |
| 1-2 meters                                         | 14 (36.8%)    | 9 (75.0%)            | 5 (19.2%)                | <0.001      |
| >2 meters                                          | 23 (60.5%)    | 2 (16.7%)            | 21 (80.8%)               |             |
| Nursing stations >2m from dialysis stations (N, %) | 34 (89.5%)    | 9 (75.0%)            | 25 (96.2%)               | 0.08        |
| Number of computers per sector                     | 4 (2; 8)      | 3 (3; 7)             | 6 (2; 9)                 | 0.45        |
| No. units with >1 waiting area                     | 6 (14.6%)     | 2 (16.7%)            | 4 (15.4%)                | 1.00        |
| Distance between waiting room chairs (N, %)**      |               |                      |                          |             |
| <1 meter                                           | 10 (26.3%)    | 7 (50.0%)            | 3 (13.0%)                |             |
| 1-2 meters                                         | 14 (36.8%)    | 5 (35.7%)            | 9 (43.5%)                | 0.049       |
| >2 meters                                          | 11 (28.9%)    | 2 (14.3%)            | 9 (43.5%)                |             |

Data are presented as median (interquartile range) or number (percentage).

Filled capacity was calculated as number of patients over 6 times the number of stations, as each dialysis station can accommodate 6 patients per week on a 3 times weekly schedule.

\*"Crowdedness" was as perceived by person completing the survey.

\*\*Waiting room crowdedness was assessed separately from dialysis unit crowdedness, resulting in slightly different totals (n=14 crowded waiting rooms, 21 non-crowded waiting rooms).

PSW: Personal support workers



**Table 2:** IPAC measures implemented in Quebec dialysis units by May 31, 2020

| Measures for ALL Patients                                     | N (%) of Units<br>N=38 | Crowded<br>N=12 | Not<br>crowded<br>N=26 | p-<br>value |
|---------------------------------------------------------------|------------------------|-----------------|------------------------|-------------|
| <b>GENERAL MEASURES</b>                                       |                        |                 |                        |             |
| Restriction of visitors                                       | 38 (100%)              | 12 (100%)       | 26 (100%)              | *           |
| Mandatory hand hygiene for patients at entrance               | 35 (92%)               | 11 (92%)        | 24 (92%)               | 1.00        |
| Signs for hand hygiene                                        | 32 (84%)               | 10 (83%)        | 22 (85%)               | 1.00        |
| Disinfection of all surfaces                                  | 32 (84%)               | 11 (92%)        | 21 (81%)               | 0.64        |
| Masks for all patients                                        | 30 (80%)               | 10 (83%)        | 20 (77%)               | 1.00        |
| <b>SCREENING and TRIAGE</b>                                   |                        |                 |                        |             |
| Screening questionnaire administered to all patients          | 37 (97%)               | 12 (100%)       | 25 (96%)               | 1.00        |
| Patient temperature taken on arrival                          | 36 (95%)               | 12 (100%)       | 24 (92%)               | 1.00        |
| All symptomatic patients tested with nasopharyngeal swab      | 36 (95%)               | 12 (100%)       | 24 (92%)               | 1.00        |
| Patients requested to call ahead if symptoms                  | 31 (82%)               | 10 (83%)        | 21 (81%)               | 1.00        |
| Separate triage post                                          | 28 (74%)               | 10 (83%)        | 18 (69%)               | 0.45        |
| Surveillance testing for all high-risk patients*              | 24 (63%)               | 7 (58%)         | 17 (65%)               | 0.68        |
| Called patients routinely the day before                      | 12 (37%)               | 3 (25%)         | 11 (42%)               | 0.47        |
| Surveillance testing of all patients with nasopharyngeal swab | 3 (8%)                 | 1 (8%)          | 2 (8%)                 | 1.00        |
| Surveillance testing of all staff with nasopharyngeal swab    | 3 (8%)                 | 2 (17%)         | 1 (4%)                 | 0.23        |
| <b>PHYSICAL DISTANCING MEASURES</b>                           |                        |                 |                        |             |
| Plexiglass or other barriers                                  | 27 (71%)               | 11 (92%)        | 16 (62%)               | 0.12        |
| Separate schedule or location for high-risk patients*         | 24 (63%)               | 6 (50%)         | 18 (69%)               | 0.25        |
| Reorganization of chairs in hemodialysis unit**               | 21 (55%)               | 4 (33%)         | 17 (65%)               | 0.09        |
| Decrease in HD Frequency                                      | 7 (18%)                | 2 (17%)         | 5 (19%)                | 1.00        |
| <b>PPE</b>                                                    |                        |                 |                        |             |
| Masks for all staff                                           | 38 (100%)              | 12 (100%)       | 26 (100%)              | *           |
| PPE teaching sessions                                         | 31 (82%)               | 10 (83%)        | 21 (81%)               | 1.00        |
| Visors for staff at all times with high risk patients*        | 29 (76%)               | 10 (83%)        | 19 (73%)               | 0.69        |
| Visors for all staff at all times                             | 13 (34%)               | 5 (42%)         | 8 (31%)                | 0.71        |
| <b>Measures for COVID-19 Suspect or Positive Patients</b>     |                        |                 |                        |             |
| <b>PHYSICAL DISTANCING MEASURES</b>                           |                        |                 |                        |             |
| Physical distancing in waiting room                           | 36 (95%)               | 12 (100%)       | 24 (92%)               | 1.00        |
| Creation of red or warm zones in the dialysis unit            | 34 (89%)               | 11 (92%)        | 23 (88%)               | 1.00        |
| Isolated transportation                                       | 31 (82%)               | 10 (83%)        | 21 (81%)               | 1.00        |
| Plexiglass or other barriers                                  | 31 (82%)               | 12 (100%)       | 19 (73%)               | 0.07        |
| Dialysis in an isolation room                                 | 32 (84%)               | 8 (67%)         | 24 (92%)               | 0.07        |
| Dialysis in a separate area of the unit                       | 20 (53%)               | 7 (58%)         | 13 (50%)               | 0.73        |
| Separate dialysis schedule                                    | 23 (53%)               | 10 (83%)        | 13 (50%)               | 0.08        |
| Transfer to another unit for dialysis                         | 14 (37%)               | 4 (33%)         | 10 (38%)               | 1.00        |
| Change of personnel to patient ratios                         | 14 (37%)               | 3 (25%)         | 11 (42%)               | 0.47        |
| Dialysis in a negative pressure ventilation room              | 12 (32%)               | 6 (50%)         | 6 (23%)                | 0.10        |
| <b>PPE</b>                                                    |                        |                 |                        |             |
| Masks for all patients                                        | 38 (100%)              | 12 (100%)       | 26 (100%)              | *           |
| Visors for staff at all times                                 | 37 (97%)               | 11 (92%)        | 26 (100%)              | 0.32        |

Color indicates the rate of implementation within included HD units (green  $\geq 80\%$ , blue 50-79%, red  $< 50\%$ )

\*Residents of long-term facilities, those in group living situations, or hospitalized in the last 14 days.

\*\*For units with  $< 2$  m between chairs, 40% were able to reorganize the chairs.

Trends with p-values  $< 0.10$  are bolded. P-values of 1.00 not shown.

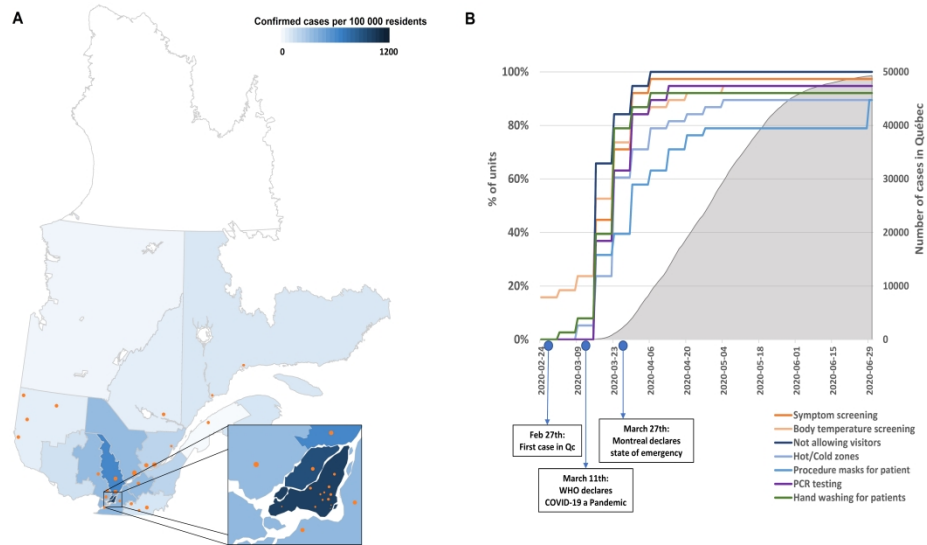

Figure 1: Implementation of general preventive measures in the province of Quebec during the first four months of the COVID-19 pandemic. A) Location of participating hemodialysis units and number of confirmed cases per capita in each Quebec Health Regions as of June 1st 2020 according to data from the Institut National de Santé Publique du Québec<sup>17</sup>) B) Timing of implementation of the most common infection prevention measures in hemodialysis units in relationship to important COVID-19 events in Quebec. As shown, the most common preventive measures were largely implemented before May 1st 2020.

719x390mm (300 x 300 DPI)

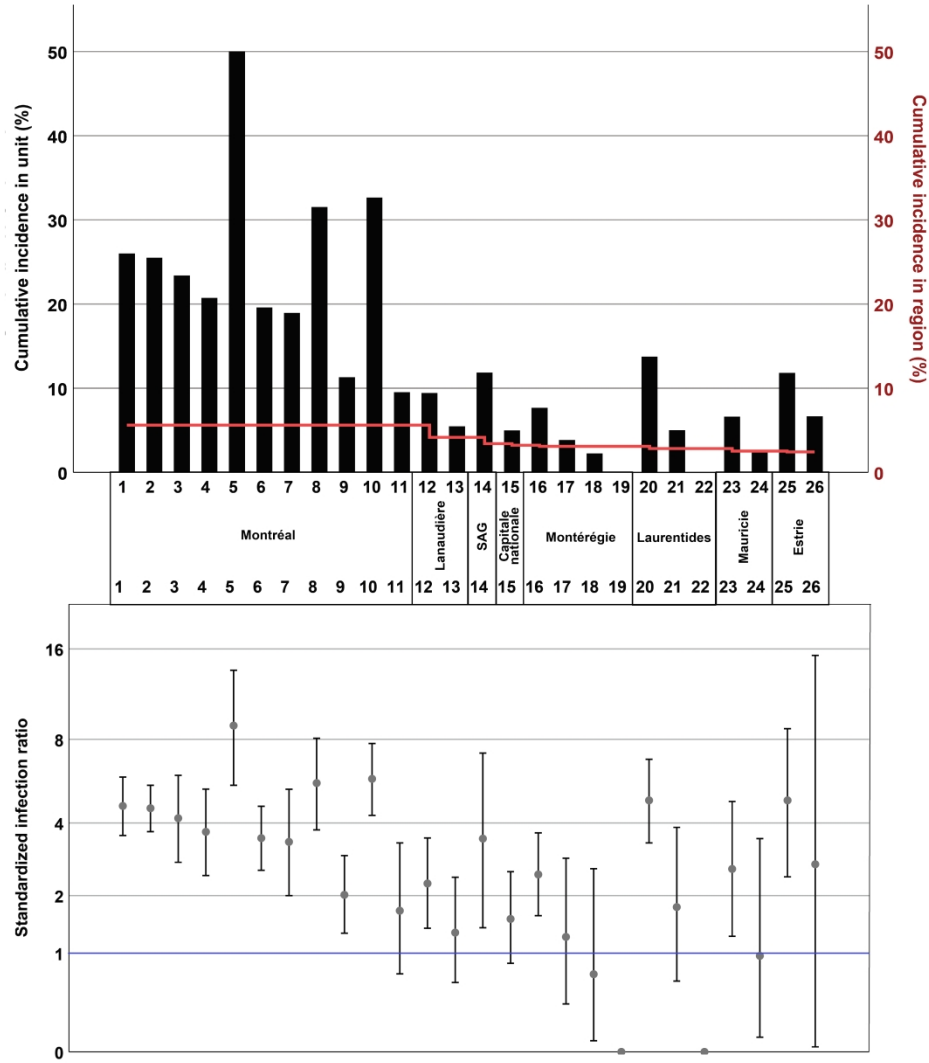

Figure 2: Cumulative infection rate in 26 hemodialysis units until March 31st 2021. A) Cumulative incidence rate in each unit (black bars) compared to cumulative incidence rate in corresponding Quebec health region (red line) according to data from the Institut National de Santé Publique du Québec<sup>22</sup>. B) Standardized infection ratio (SIR) in each hemodialysis unit with 95% confidence intervals. A SIR higher than 1 (blue line) indicates that the observed infection rate in the unit is higher than expected based of the infection rate observed in the respective Quebec health region.

**Supplementary material: Feasibility of infection control measures in hemodialysis units to prevent outbreaks of COVID-19: An empiric province-wide study from Quebec**

**Supplemental Figure S1: Relationship between the number of patients per hemodialysis unit and % filled capacity of hemodialysis units in Quebec ( $r=0.607$ ,  $p<0.001$ ).**

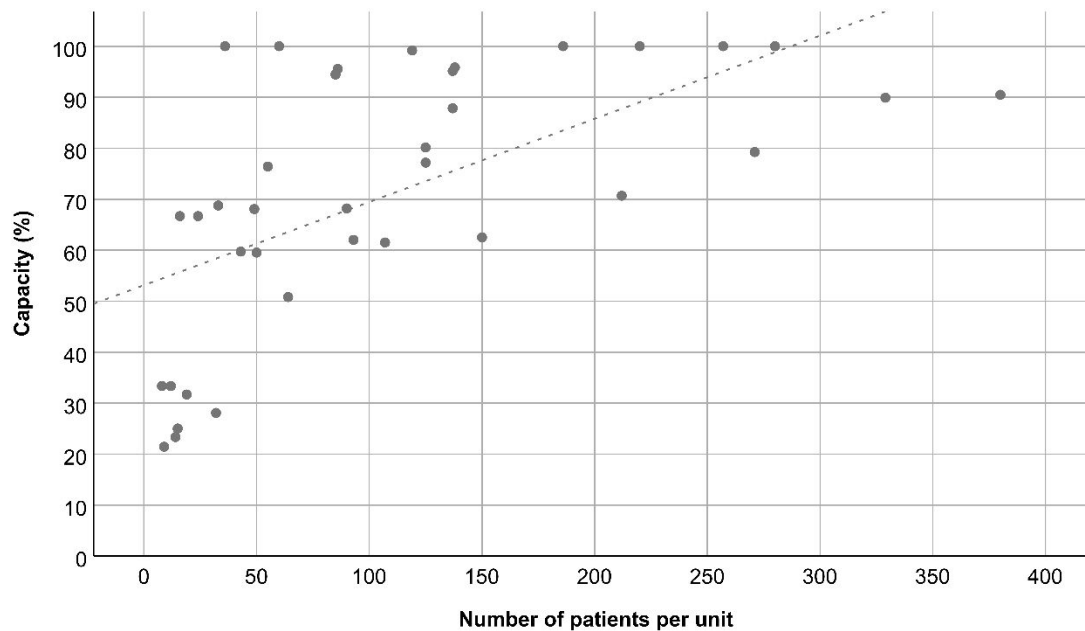

**Table S1: Standardized infection ratio (SIR) in participating hemodialysis unit (n=22) according to specific infection prevention and control (IPAC) measures deployed in the first phase of the pandemic.**

| IPAC measure                                                                  |     | SIR (Median [IQR]) | p-value |
|-------------------------------------------------------------------------------|-----|--------------------|---------|
| Separate triage post at the entrance of HD unit                               | Yes | 2.48 [1.54; 4.54]  | 0.96    |
|                                                                               | No  | 2.74 [0.96; 4.86]  |         |
| Use of physical barriers within the units                                     | Yes | 2.93 [1.62; 4.75]  | 0.46    |
|                                                                               | No  | 2.68 [0.96; 3.48]  |         |
| Creating cohorts of high-risk patients                                        | Yes | 3.49 [1.70; 4.86]  | 0.09    |
|                                                                               | No  | 2.27 [0.96; 2.74]  |         |
| Re-arrangement of the unit to maintain social distancing                      | Yes | 2.68 [1.55; 4.17]  | 0.89    |
|                                                                               | No  | 2.98 [1.25; 4.70]  |         |
| Systematic PCR screening of high-risk patients (up to June 30 <sup>th</sup> ) | Yes | 2.48 [1.55; 4.55]  | 0.96    |
|                                                                               | No  | 2.74 [0.96; 4.86]  |         |

**Appendix 1: Investigators and collaborators of the COVID-19 Quebec Renal Network:**

- Dr Fabrice Mac-Way, CHU de Québec, Portneuf, Baie-Comeau, Baie Saint-Paul, Sept-Iles
- Dr François Tashereau, Ville-Maire, La Sarre, Val d'Or
- Dr Louise Roy, Hôpital du suroit, Valleyfield, CHUM
- Dr Guillaume Bollé, CHUM
- Dr Mélanie Godin, Magog, Granby
- Dr Thi Hai Van Vo, Verdun
- Dr Marc Ghannoum, Verdun
- Dr Laura Pillozzi-Edmonds, St-Marys
- Dr Karine Turcotte, Victoriaville
- Dr Pierre Cartier, Saint-Jérôme, Rivière-rouge, LG rolland (Saint-Jérôme)
- Dr Aïcha Gafsi, Bas Saint-Laurent
- Dr Damien Belisle, CIUSM Saguenay Lac-Saint-Jean
- Dr Shiu Hoi Ying, Lakeshore
- Dr Dominique Dupuis, Anna-Laberge
- Dr Alexis Payette, Centre Hospitalier de Lanaudière, Centre Hospitalier Pierre Le-Gardeur
- Dr Rémi Goupil, Hôpital du Sacré-Cœur de Montréal
- Dr Serge Cournoyer, Centre intégré de santé et de services sociaux de la Montérégie-Centre
- Dr Mohsen Agharazii, CHU de Québec
- Dr Raman Agnihotram, McGill University
- Dr Raman Agnihotram, McGill University
- Dr Ahmed ElGeneidy, McGill University
- Dr Marie-Chantal Fortin, CHUM
- Dr Caroline Lamarche, Centre de recherche de l'hôpital Maisonneuve-Rosemont
- Dr Jean-Phillipe Lafrance, Centre de recherche de l'hôpital Maisonneuve-Rosemont
- Dr Louis-Philippe Laurin, Centre de recherche de l'hôpital Maisonneuve-Rosemont
- Dr François Madore, Université de Montréal
- Dr Murray Vasilevsky, McGill University

1  
2  
3  
4  
5  
6  
7  
8  
9  
10  
11  
12  
13  
14  
15  
16  
17  
18  
19  
20  
21  
22  
23  
24  
25  
26  
27  
28  
29  
30  
31  
32  
33  
34  
35  
36  
37  
38  
39  
40  
41  
42  
43  
44  
45  
46  
47  
48  
49  
50  
51  
52  
53  
54  
55  
56  
57  
58  
59  
60

Confidential
